## Research Articles

# **Title: Comparative genomic analyses highlight the contribution of pseudogenized protein-coding genes to human lincRNAs**

Wan-Hsin Liu<sup>1,2,3,†</sup>, Zing Tsung-Yeh Tsai<sup>1,4†</sup>, and Huai-Kuang Tsai<sup>1,\*</sup>

<sup>1</sup> Institute of Information Science, Academia Sinica, Taipei, 115, Taiwan

<sup>2</sup> Bioinformatics Program, Taiwan International Graduate Program, Academia Sinica, Taipei, 115, Taiwan

<sup>3</sup> Institute of Bioinformatics and Systems Biology, National Chiao Tung University, Hsinchu, 300, Taiwan

<sup>4</sup> Department of Plant Biology, Michigan State University, East Lansing, MI 48824, USA

\* Author for Correspondence: Huai-Kuang Tsai, Institute of Information Science, Academia Sinica, Taiwan, [hktsai@iis.sinica.edu.tw](mailto:hktsai@iis.sinica.edu.tw)

† The first two authors contributed equally to this work.

## 19    **Abstract**

20    **Background:** The regulatory roles of long intergenic noncoding RNAs (lincRNAs) in  
 21    humans have been revealed through the use of advanced sequencing technology. Recently,  
 22    three possible scenarios of lincRNA origin have been proposed: *de novo* origination from  
 23    intergenic regions, duplication from long noncoding RNA, and pseudogenization from protein.  
 24    The first two scenarios are largely studied and supported, yet few studies focused on the  
 25    evolution from pseudogenized protein-coding sequence to lincRNA. Due to the non-mutually  
 26    exclusive nature that these three scenarios have, accompanied by the need of systematic  
 27    investigation of lincRNA origination, we conduct a comparative genomics study to  
 28    investigate the evolution of human lincRNAs.

29    **Results:** Combining with syntenic analysis and stringent Blastn *e*-value cutoff, we found that  
 30    the majority of lincRNAs are aligned to the intergenic regions of other species. Interestingly,  
 31    193 human lincRNAs could have protein-coding orthologs in at least two of nine vertebrates.  
 32    Transposable elements in these conserved regions in human genome are much less than  
 33    expectation. Moreover, 19% of these lincRNAs have overlaps with or are close to  
 34    pseudogenes in the human genome.

35    **Conclusions:** We suggest that a notable portion of lincRNAs could be derived from  
 36    pseudogenized protein-coding genes. Furthermore, based on our computational analysis, we  
 37    hypothesize that a subset of these lincRNAs could have potential to regulate their paralogs by  
 38    functioning as competing endogenous RNAs. Our results provide evolutionary evidence of  
 39    the relationship between human lincRNAs and protein-coding genes.

40

41    **Key words:** long intergenic noncoding RNAs, pseudogenization, transposable element,  
 42    competing endogenous RNA, syntenic analysis

43

## 44 **Background**

45 Long intergenic non-coding RNAs (lincRNAs) are a subclass of non-coding RNAs, which are  
 46 longer than 200 nucleotides and locate between protein-coding genes. The advance of  
 47 sequencing technology has recently revealed that lincRNAs present in various aspects of  
 48 transcriptome and largely transcribed in many species from invertebrates to humans [1-3].  
 49 LincRNAs participate the regulation of many biological processes, such as the development  
 50 of neuron components [3], gene expression [4, 5], and carcinogenesis [6]. Although the  
 51 functions of lincRNAs are gradually explored, the originating mechanism of lincRNA has not  
 52 attained to a conclusion. As the origination of lincRNAs would increase the regulatory  
 53 complexity and impact several biological processes, it is intriguing to know where they  
 54 evolve from and what the evolutionary mechanisms are.

55 Currently, three non-mutually exclusive possible mechanisms of lincRNAs origin have  
 56 been proposed [1, 2, 7]. First, lincRNAs could be evolved from the duplication of other long  
 57 non-coding RNAs (lncRNAs). Second, lincRNAs could be evolved from *de novo* origin,  
 58 where the sequences could be previously noncoding or derived from transposable elements  
 59 (TEs). Third, lincRNAs are considered to be originated from pseudogenization of  
 60 protein-coding genes sequences. A well-studied lincRNA, *Xist*, which plays an important role  
 61 in X chromosome inactivation [13, 14], is regarded as originated from protein-coding genes,  
 62 *Lnx3*, by shown to contain the debris of a protein-coding genes sequences [15].

63 TE has been suggested as one of the major driving forces of lincRNA evolution. The  
 64 capability of TE to transfer sequence to different regions across the genome allows new  
 65 transcripts by providing valid regulatory sequences. Regulatory sequences such as promoter,  
 66 transcription start site, enhancer, and splicing site can lead to transcribe a novel RNA [8] or  
 67 process a precursor RNA into a stable transcript [9, 10]. A recent study has estimated about  
 68 10% of human lncRNA transcripts that were originated from long terminal repeats [8].

Moreover, many mature lncRNAs have been found entirely composed of endogenous retroviral sequences [8]. In addition to introducing regulatory sequence to cause lncRNAs, studies also found a substantial fraction of lncRNAs contains TE-derived sequences [11, 12], indicating a close association between TE and lncRNA.

However, due to the less conservation of lincRNAs sequences comparing to the mRNAs sequences, the studies of the lincRNAs from pseudogenization are more limited than the other two. In addition, the high TEs composition of exonic regions in lincRNAs (*i.e.* TEs inserted in the pseudogenes before and/or after the birth of the lincRNA) could also lead to underestimate the contribution of protein-coding gene pseudogenization to lincRNA origination [8]. Therefore, a detailed investigation of the lincRNAs originated by protein-coding gene pseudogenization is needed. Two key questions of what extents of the pseudogenized protein-coding genes contribute to lincRNA origination and whether there are some resulting regulations of these lincRNAs should be addressed.

The pseudogene has two different types, *i.e.* duplicated pseudogene and unitary pseudogene, that originate by different mechanisms and have distinct characteristic features [16]. A duplicated pseudogene was a copy of a gene which has been modified during and/or after duplication that resulted in loss of gene function. Alternatively, unitary pseudogene was a gene becoming disabled instead of a disable copy of a gene. Thus, the originating lincRNAs from protein-coding gene pseudogenization might follow such two different evolutionary trajectories, which has not been investigated thoroughly so far.

In this study, we focused on the human lincRNAs that might derive from protein-coding gene sequences. The potential origination for each human lincRNA was investigated by identifying its homologous sequences across nine vertebrate species. We analyzed sequence composition and genomic location of these putative orthologs to understand where human lincRNAs may originate from and what biogenesis components could contribute to the

94 origination. According to our results, most of human lincRNAs have putative orthologs in at  
 95 least two other vertebrates. Interestingly, although the majority locates in intergenic regions as  
 96 expected, certain portions of these putative orthologs are partially or even fully annotated as  
 97 protein-coding regions in at least two of the nine vertebrate species. We also found a subset of  
 98 lincRNAs has conserved sequences in intronic regions in other species and the contribution of  
 99 TEs to these alignments between lincRNAs and intronic sequences are marginal. To further  
 100 explore the contribution of pseudogenized protein-coding gene to human lincRNAs, we  
 101 determined which type of protein pseudogenization a lincRNA may originate from by  
 102 investigate whether any human ortholog of its exonic ortholog in other species exists.

103

## 104 **Methods**

### 105 *Genome annotation and sequence collection*

106 First of all, cDNA sequences and genome coordinates of all the 7,340 human lincRNAs  
 107 annotated in the Ensembl database (release 74) were downloaded [17]. These annotated  
 108 lincRNAs were identified based on chromatin features and evidently low coding potential (*i.e.*  
 109 for each lincRNA, no any known protein domain is found, and the predicted open-reading  
 110 frame, if exists, is shorter than 35% of the total length). We further removed lincRNAs which  
 111 overlap with human protein-coding genes to avoid potential bias in identifying putative  
 112 orthologs. As a result, a total number of 6,618 lincRNAs were used in the following analysis.

113 Protein-coding sequences and genome annotations including non-coding gene  
 114 annotations of the following nine vertebrate species were also downloaded from the Ensembl  
 115 database: chimpanzee (*Pan troglodytes*; CHIMP2.1.4), orangutan (*Pongo abelii*; PPYG2),  
 116 macaque (*Macaca mulatta*; MMUL\_1), cow (*Bos taurus*; UMD3.1), dog (*Canis familiaris*;  
 117 CanFam3.1), mouse (*Mus musculus*; GRCm38.p2), opossum (*Monodelphis domestica*;  
 118 BROADO5), chicken (*Gallus gallus*; Galgal4), and zebrafish (*Danio rerio*; Zv9).

# ***Identification of putative orthologs of human lincRNAs in nine vertebrate species***

We applied Blastn to identify matched sequences for cDNA sequences of each human lincRNA in the nine genomes. The parameters of Blastn (word size = 7, reward = 1, penalty = -1, and e-value <  $10^{-10}$ ) were customized to increase the sensitivity for short alignment [18].. For each Blastn match, we then performed synteny analysis, which considers the order of conserved genes within the DNA regions between two species and has been shown to increase the reliability of identification of lincRNA homology region [19, 20]. We constrained at least one pair of conserved neighbor genes (*i.e.* one upstream and one downstream) to exist within  $\pm 750\text{kb}$ . We denote each of these regions as a candidate of putative ortholog (see a sketch map shown in **Fig. 1** and workflow in **Fig. S1**).

To further increase the confidence of our identification, any candidate of putative ortholog identified only in one of the nine species was removed. If there were multiple potential putative orthologs, we chose the one that was present most across the nine species. In the case of a continued tie, we selected the match with the lowest e-value. If a putative ortholog overlaps with at least one protein-coding gene, we annotated the putative ortholog as a protein-coding ortholog. If a putative ortholog did not overlap with a protein-coding gene but with at least one non-coding gene (*i.e.* either a lincRNA or a short non-coding RNA), we annotated the putative ortholog as a non-coding ortholog. The remaining putative orthologs were annotated as intergenic orthologs. To explore whether the human long non-coding sequences are associated with the exonic regions of protein-coding genes in other vertebrates, for each protein-coding ortholog, we calculated the percentages covered by exonic, intronic, and intergenic regions of protein-coding gene, respectively. The *exon/intron/intergenic coverage* was defined as the ratio between the length of exon/intron/intergenic-covered regions in the putative orthologs and the length of putative orthologs.

144

# 145 ***Investigation of TEs in putative ortholog***

146 To determine the coverage of TEs for each identified putative orthologs, we adopted  
 147 RepeatMasker 4.0.3. [21], which was downloaded from Repeat Masker website  
 148 (<http://www.repeatmasker.org/>) to identify TEs following the criteria used by Kapusta *et al.*  
 149 [8]: only the sequences covered by more than 10 bps of RepeatMasker-annotated TEs were  
 150 regarded as those derived from TE fragments. Furthermore, to study whether the annotated  
 151 exon/intron/intergenic-covered regions were originated from TEs, we calculated *TE coverage*  
 152 which was defined as the percentage of sequence identified as TEs by RepeatMasker.

153

# 154 ***Examination of potential ceRNA role of lincRNA***

155 According to the competing endogenous RNAs (ceRNA) theory [22], a RNA transcript that  
 156 has microRNA binding site can sequester microRNAs from other RNA transcripts sharing the  
 157 same microRNA binding site, thus regulating their expressions. Putative ceRNA-mRNA pairs  
 158 annotated in the lncCeDB database [23] were used to examine whether lincRNAs could have  
 159 potential to be ceRNAs for their putative paralog [23]. We assessed statistical significance of  
 160 the observed number of ceRNA-mRNA pairs  $N_{obv}$  in the lincRNA-putative paralog pairs by  
 161 using randomization via bootstrapping. Each time, we sampled  $n$  lincRNA-protein-coding  
 162 genes from Ensembl database, where  $n$  is equal to the number of lincRNA-putative paralog  
 163 pairs we found. The distribution of  $N$  was estimated given the null hypothesis that the number  
 164 of ceRNA-mRNA pairs in the lincRNA-putative paralog pairs is the result of pure chance. For  
 165 a one-tailed test with a rejection region in the upper tail, the bootstrap  $p$ -value  $P(N_{obv})$  for  $N_{obv}$ ,  
 166 was estimated by the proportion of randomized samples that contain number of  
 167 ceRNA-mRNA pairs  $> N_{obv}$ . For  $B$  randomized datasets, we calculated the bootstrap  $p$ -value

168  $P(N_{obv}) = \frac{1}{B} \sum_{k=1}^B I(N_k > N_{obv})$ , where  $I(x)$  is an indicator function yielding **1** if the

ceRNA-mRNA pairs in  $k$ -th random dataset ( $N_k$ ) is more than in the original  
lincRNA-putative paralog pairs ( $N_{obv}$ ) and 0 otherwise. Here we conducted a bootstrapping  
analysis with  $B = 10000$ .

### ***Bootstrapping analysis of homologous sequences***

A bootstrap analysis was performed to prove that the homologous sequences identified in  
our study are not simply artifact. By focusing on the 193 lincRNAs having protein-coding  
orthologs, we first shuffled each of the sequences 5,000 times with control of di-nucleotide  
content. We then performed Blastn (with the same setting: word size = 7, reward = 1, penalty  
= -1) to align shuffled sequences to syntenic regions (with the same definition: -750 kb to  
+750 kb sequence with conserved order of orthologous neighbor genes) if any in the nine  
vertebrate species. For each shuffled sequence, we selected the hit with the lowest Blastn  
 $e$ -value as the alignment. According to our shuffling analysis, none of the shuffled sequences  
can have a hit with blast  $e$ -value  $< 10^{-10}$ . The Blastn  $e$ -value distributions of shuffled  
sequences and original lincRNAs are shown in Fig. S2. The results show that our method of  
syntenic analysis and Blastn  $e$ -value is sufficient to discriminate real homologous  
relationships from noise.

## **Results and Discussion**

### ***De novo origination and protein pseudogenization contribute to lincRNA evolution mostly***

We performed syntenic analysis with nine vertebrate genomes to identify putative orthologs  
of human lincRNAs (see Method). A putative ortholog was defined as a region that has  
significant sequence similarity and share the same synteny with human lincRNAs (**Fig. 1**).  
Based on the genome annotations, putative orthologs were further classified into three groups:  
putative intergenic orthologs, putative protein-coding orthologs, and putative non-coding



orthologs (*Table SI*, see Methods). According to the proportion of each human lincRNA group in the nine species, the majority of their putative orthologs belonged to intergenic orthologs, followed by protein-coding orthologs, and only few putative orthologs were classified as non-coding orthologs (**Fig. 2**). This result reflects the relative contributions of the three lincRNA origination scenarios: *de novo* origination, protein pseudogenization, and duplication from lncRNA.

The predominant number of putative intergenic orthologs could be mainly contributed by *de novo* origination, in particular the insertion of TEs. TEs have been found to be abundant in intergenic regions due to their moving and amplifying ability [8, 24-26]. Together with the high TEs composition of lincRNA [8, 27, 28], our observation supports that TE is one of the major factors contributing to lincRNA origination. Another possible explanation of intergenic orthologs might be incomplete annotation of non-coding RNAs. Moreover, current annotation of lincRNA could bias to primates [29], thus lead to underestimate the contribution of lncRNA duplication in lincRNA origination.

As the second large group in the putative orthologs, although the ratio varies significantly across species (e.g. 4% in chimpanzee and 40% in zebrafish), the numbers of putative protein-coding orthologs are around 160 to 310 in the closer species. Among the total 6,618 human lincRNAs, 297 of them (4.5%) have protein-coding orthologs in at least two vertebrates. Our results indicate certain contribution of protein-coding gene pseudogenization to human lincRNAs as reported in the previous study which a lincRNA (*e.g. Xist*) can retain both the syntenic context and the debris of the exon of protein (*e.g. Lnx3*) [15]. Although the number is less than the number of putative intergenic orthologs, the amount of putative protein-coding orthologs is more than previously documented. The reason why the number of putative protein-coding orthologs is more than previously documented could be in previous studies, to found the lncRNA orthologs and to avoid the high coding potential bias of the

non-coding RNA sequences, the RNAs that have high coding potential such as mRNAs and pseudogenes are often kicked out in the lncRNA datasets in early parsing process.

The evidence of protein pseudogenization is stronger when there are annotated orthologous relationships among the genes where a putative ortholog resides in different species (referred as aligned proteins). Hence, we adopted orthologous relationships in Ensembl [30] and show that 193 of 297 (65% ) of the aligned proteins are annotated as orthologous pairs. For example, human lincRNA AC004471.10 possesses aligned proteins TSSK2 in cow, ENSCAFG00000023784 in dog, ENSMMUG00000031114 in macaque, and Tssk2 in mouse, which are orthologous with each other. To sum up, the significantly greater numbers of intergenic and protein-coding orthologs than non-coding orthologs reveal the important roles of *de novo* origination and protein pseudogenization in lincRNA evolution.

Lastly, the number of non-coding orthologs here was much less than the others. One explanation is, as mentioned previously, the incomplete and biased annotation of non-coding RNAs on other species. Another reason is the relative small number of non-coding genes in the reference genome and the poor conservation of lincRNAs. The number of non-coding genes in each reference species is around 10%-30% of protein-coding genes. Because protein-coding orthologs only account for 30% of putative orthologs or less, the numbers of non-coding orthologs are less than 3%. In addition, we could not identify any non-coding orthologs of lincRNA in mouse or zebrafish genome. The result agreed with recent study in zebrafish that reported merely a minority of lincRNAs showed significant sequence similarity to other lncRNAs [18].

#### ***TEs have only minor contribution in the sequence similarity between a lincRNA and its protein-coding ortholog***

Since the conserved introns have been proposed to be a potential source of lncRNA [31], the corresponding orthologs of the lncRNAs locating within an open reading frame (ORF) may

not be originated from protein pseudogenization. The investigation in the gene structure (*i.e.* the coverages and distributions of exons and introns) of protein-coding orthologs is needed to distinguish if protein pseudogenization was involved in lincRNA evolution. To evaluate how many protein-coding orthologs could be considered as evidences of protein pseudogenization, *exon coverage*, *intron coverage*, and *intergenic coverage* were examined for each protein-coding ortholog (see Methods).

The distributions of exon coverage, intron coverage, and intergenic coverage for each protein-coding ortholog are shown in **Fig. 3**. Considering all of the putative orthologs from the nine vertebrates, the results showed 692 putative protein-coding orthologs (32%) in which *exon coverage* was greater than both *intron coverage* and *intergenic coverage*. Moreover, 263 (12%) fully located within exonic regions (*i.e.* *exon coverage* = 100%), which were defined as exonic orthologs in this study. On the contrary, 1124 (52%) putative protein-coding orthologs were intronic orthologs, which completely located within intronic regions (*i.e.* *intron coverage* = 100%). Studies have suggested that some lncRNAs could be post-processed into small nucleolar RNAs (snoRNAs) [32], which are involved in ribosome synthesis or translation, and are usually intronic sequences [33]. The hypothesis is that lncRNAs could be post-processed into snoRNAs and involved in ribosome synthesis and translation mechanism. Therefore, one of the possible explanations is that these conserved intronic orthologs might be unannotated lncRNAs.

Besides, TEs could be an alternative explanation for the high intronic coverage because TEs are known to locate in introns more than in exons [8, 34], and a high TE composition are reported in lincRNAs [8, 27, 28]. Thus, we identified TE for each putative protein-coding ortholog using RepeatMasker and calculated *TE coverage* for each putative protein-coding ortholog (see Methods). The results showed that TEs covered 47% region when considering all introns of protein-coding orthologs jointly. Unexpectedly, low *TE*

*coverages* (**Fig. 4(a)**, average = 0.32) were observed even the intronic orthologs. Similarly, *TE coverages* of exonic orthologs and intergenic orthologs were also low (**Fig. 4 (b) and 4(c)**, average = 0.07 and 0, respectively). Taking together, insertion of TEs may only contribute to a minor part of the sequence similarity between lincRNA and protein-coding orthologs.

### ***LincRNAs derived from duplicated pseudogenes could impact the regulation of their putative paralogs***

Exonic orthologs of lincRNAs identified in our study showed that a certain portion of human lincRNAs could be derived from protein pseudogenization (**Fig. 3**). According to extremely low *TE coverages* in the protein-coding orthologs (Fig. 4), the results implied the minor contribution of TEs in origination of lincRNA. In particular, the *TE coverages* were zero in the exonic orthologs of 108 lincRNAs (*i.e.* without TE insertion). Consequently, we ask what mechanism causes such protein pseudogenization that involved in lincRNA origination.

GENCODE project [16] has categorized pseudogenes into three main groups based on genomic features and evolutionary mechanisms: processed pseudogenes, duplicated (also referred to as unprocessed) pseudogenes, and unitary pseudogenes. Processed pseudogenes were originated from retrotransposition which was a fraction of mRNA back into the genome since they contain only exonic sequence and do not retain the upstream regulatory regions. In contrast, duplicated pseudogenes have intron-exon like genomic structures and may still maintain the upstream regulatory sequences of their parents, as a result, duplicated pseudogenes might derive from duplication of functional genes. Last, since unitary pseudogene lost their coding parental gene in human and can only find the coding ortholog in a reference species, unitary pseudogene might be originated from accumulated fixed disabling mutations in a coding gene [16].

Among the 108 lincRNAs having exonic orthologs, 66 of them do not have any putative paralog nor TE coverage. Moreover, sixteen (24.2%) of them overlapped with pseudogenes and eight (12.1%) of them are just next to pseudogene, suggesting the potential origination from unitary pseudogene. One example is lincRNA CTD-2555O16.1 which overlapped with pseudogene TEX21P, as shown in **Fig. 5**. On the other hand, 42 lincRNAs have putative paralogs, that is, their aligned proteins possess at least one human ortholog (e-value less than  $10^{-10}$ ). In addition, among these 42 lincRNAs, 13 (31%) overlapped with known pseudogene. Take lincRNA RP5-998N21.4 for example (**Fig. 6**), its transcript overlapped with the transcript of pseudogene FCGR1C. Moreover, four lincRNAs such as CROCCP2 and ADAM20P1 are annotated as pseudogenes of human orthologs of their aligned proteins from the Ensembl records.

A hypothesized explanation of such relationships is that lincRNAs regulate their putative paralog by functioning as a competing endogenous RNA (ceRNA). Based on the high sequence identity and close genomic positions between lincRNA and its putative paralog, it is possible that lincRNA regulates its putative paralog as a ceRNA. According to the annotation in the lncCeDB database [23], 28 lincRNA-putative paralog pairs were annotated as ceRNA-mRNA pairs. We further performed a bootstrapping analysis (see Methods) to test whether ceRNA-mRNA pairs annotated in lncCeDB database were enriched in these lincRNA-putative paralog pairs identified in the present study. The significant enrichment (bootstrap  $p < 6.8 \times 10^{-3}$ ) supports the proposed hypothesis that lincRNA could possibly regulate its putative paralog.

Through Gene Ontology enrichment analysis, most of these putative paralogs were found to have binding functions (metal ion binding,  $p = 5.05 \times 10^{-9}$ ; cation binding,  $p = 9.64 \times 10^{-9}$ ; DNA binding,  $p = 1.12 \times 10^{-8}$ ; nucleic acid binding,  $p = 1.88 \times 10^{-7}$ ; heterocyclic compound binding,  $p = 1.80 \times 10^{-4}$ ; organic cyclic compound binding,  $p = 2.65 \times 10^{-4}$ ; ion binding,  $p =$

$6.31 \times 10^{-4}$ ). In addition, these proteins significantly associate with neuron development and eye disorder [35-37] according to the Online Mendelian Inheritance in Man (OMIM) database [38]. With conserved sequences, lincRNA could influence expression of putative paralogs by post-transcriptional regulation as endogenous siRNA or buffering effect as their decoys. Moreover, we cannot rule out the possibility that some genes are functional as well in RNA level thus their paralogous lincRNA could also contribute to these particular functions.

## Conclusions

Protein pseudogenization is one of the scenarios of human lincRNA originations. According to the comparative genomics analyses among human and nine vertebrate species in this study, 193 of the 6,614 human lincRNAs have protein-coding orthologs, which are conserved sequences in protein-coding genes of other species. Our study reveals the role of protein pseudogenization in human lincRNA origination. We anticipate that these results will bring insights to the evolutionary originations and genetic functionalities of human lincRNAs.

## Declarations

### *List of abbreviations*

|         |                               |
|---------|-------------------------------|
| lincRNA | long intergenic noncoding RNA |
| TE      | transposable element          |
| lncRNA  | long non-coding RNA           |
| ORF     | open reading frame            |
| ceRNA   | competing endogenous RNA      |

### *Ethics*

Not applicable

343

# 344 *Consent to publish*

345 Not applicable

346

# 347 *Competing interests*

348 The authors declare that they have no competing interests.

349

# 350 *Funding*

351 This work was supported by the Taiwan Ministry of Science and Technology

352 (<http://www.most.gov.tw>) [MOST104-2917-I-564-070 to Z.T.-Y.T. and

353 MOST103-2221-E-001-029-MY2 to H.-K.T.].

354

# 355 *Authors' contributions*

356 WHL, ZTYT, and HKT designed the analyses. WHL collected the data and performed the

357 analyses. WHL, ZTYT, and HKT wrote the paper. HKT was the principal investigator. All

358 authors read and approved the final manuscript.

359

# 360 *Availability of data and materials*

361 The datasets supporting the conclusions of this article are included within the article and its

362 additional files.

363

# 364 *Acknowledgements*

365 The authors are thankful to Jen-Hao Cheng, Wen-Yi Chu, and Jia-Hsin Huang for their

366 suggestions on this manuscript.

## References

1. Ulitsky I, Bartel DP: **lincRNAs: genomics, evolution, and mechanisms.** *Cell* 2013, **154**(1):26-46.
2. Kapusta A, Feschotte C: **Volatile evolution of long noncoding RNA repertoires: mechanisms and biological implications.** *Trends in genetics : TIG* 2014, **30**(10):439-452.
3. Fatica A, Bozzoni I: **Long non-coding RNAs: new players in cell differentiation and development.** *Nature reviews Genetics* 2014, **15**(1):7-21.
4. Rinn JL, Chang HY: **Genome regulation by long noncoding RNAs.** *Annual review of biochemistry* 2012, **81**:145-166.
5. Geisler S, Collier J: **RNA in unexpected places: long non-coding RNA functions in diverse cellular contexts.** *Nature reviews Molecular cell biology* 2013, **14**(11):699-712.
6. Cheetham SW, Gruhl F, Mattick JS, Dinger ME: **Long noncoding RNAs and the genetics of cancer.** *British journal of cancer* 2013, **108**(12):2419-2425.
7. Ponting CP, Oliver PL, Reik W: **Evolution and functions of long noncoding RNAs.** *Cell* 2009, **136**(4):629-641.
8. Kapusta A, Kronenberg Z, Lynch VJ, Zhuo X, Ramsay L, Bourque G, Yandell M, Feschotte C: **Transposable elements are major contributors to the origin, diversification, and regulation of vertebrate long noncoding RNAs.** *PLoS genetics* 2013, **9**(4):e1003470.
9. Almada AE, Wu X, Kriz AJ, Burge CB, Sharp PA: **Promoter directionality is controlled by U1 snRNP and polyadenylation signals.** *Nature* 2013, **499**(7458):360-363.
10. Ntini E, Jarvelin AI, Bornholdt J, Chen Y, Boyd M, Jorgensen M, Andersson R, Hoof I, Schein A, Andersen PR *et al*: **Polyadenylation site-induced decay of upstream transcripts enforces promoter directionality.** *Nature structural & molecular biology* 2013, **20**(8):923-928.
11. Johnson R, Guigo R: **The RIDL hypothesis: transposable elements as functional domains of long noncoding RNAs.** *RNA (New York, NY)* 2014, **20**(7):959-976.
12. Kannan S, Chernikova D, Rogozin IB, Poliakov E, Managadze D, Koonin EV, Milanesi L: **Transposable Element Insertions in Long Intergenic Non-Coding RNA Genes.** *Frontiers in bioengineering and biotechnology* 2015, **3**:71.
13. Engreitz JM, Pandya-Jones A, McDonel P, Shishkin A, Sirokman K, Surka C, Kadri S, Xing J, Goren A, Lander ES *et al*: **The Xist lncRNA exploits three-dimensional genome architecture to spread across the X chromosome.** *Science* 2013, **341**(6147):1237973.
14. Simon MD, Pinter SF, Fang R, Sarma K, Rutenberg-Schoenberg M, Bowman SK, Kesner BA, Maier VK, Kingston RE, Lee JT: **High-resolution Xist binding maps reveal two-step spreading during X-chromosome inactivation.** *Nature* 2013, **504**(7480):465-469.
15. Duret L, Chureau C, Samain S, Weissenbach J, Avner P: **The Xist RNA gene evolved in eutherians by pseudogenization of a protein-coding gene.** *Science* 2006, **312**(5780):1653-1655.
16. Pei B, Sisic C, Frankish A, Howald C, Habegger L, Mu XJ, Harte R, Balasubramanian S, Tanzer A, Diekhans M *et al*: **The GENCODE pseudogene resource.** *Genome biology* 2012, **13**(9):R51.



- 412 17. Flicek P, Ahmed I, Amode MR, Barrell D, Beal K, Brent S, Carvalho-Silva D, Clapham P,  
413 Coates G, Fairley S *et al*: **Ensembl 2013**. *Nucleic acids research* 2013, **41**(Database  
414 issue):D48-55.
- 415 18. Ulitsky I, Shkumatava A, Jan CH, Sive H, Bartel DP: **Conserved function of lincRNAs in**  
416 **vertebrate embryonic development despite rapid sequence evolution**. *Cell* 2011,  
417 **147**(7):1537-1550.
- 418 19. Washietl S, Kellis M, Garber M: **Evolutionary dynamics and tissue specificity of**  
419 **human long noncoding RNAs in six mammals**. *Genome research* 2014.
- 420 20. Cabili MN, Trapnell C, Goff L, Koziol M, Tazon-Vega B, Regev A, Rinn JL: **Integrative**  
421 **annotation of human large intergenic noncoding RNAs reveals global properties**  
422 **and specific subclasses**. *Genes & development* 2011, **25**(18):1915-1927.
- 423 21. Smit AFA, Hubley R, Green P: **RepeatMasker Open-3.0**. In.; 1996.
- 424 22. Karreth FA, Pandolfi PP: **ceRNA cross-talk in cancer: when ce-bling rivalries go awry**.  
425 *Cancer discovery* 2013, **3**(10):1113-1121.
- 426 23. Das S, Ghosal S, Sen R, Chakrabarti J: **InCeDB: database of human long noncoding**  
427 **RNA acting as competing endogenous RNA**. *PloS one* 2014, **9**(6):e98965.
- 428 24. Feschotte C: **Transposable elements and the evolution of regulatory networks**.  
429 *Nature reviews Genetics* 2008, **9**(5):397-405.
- 430 25. Bourque G: **Transposable elements in gene regulation and in the evolution of**  
431 **vertebrate genomes**. *Current opinion in genetics & development* 2009,  
432 **19**(6):607-612.
- 433 26. Rebollo R, Romanish MT, Mager DL: **Transposable elements: an abundant and**  
434 **natural source of regulatory sequences for host genes**. *Annual review of genetics*  
435 2012, **46**:21-42.
- 436 27. Elisaphenko EA, Kolesnikov NN, Shevchenko AI, Rogozin IB, Nesterova TB, Brockdorff  
437 N, Zakian SM: **A dual origin of the Xist gene from a protein-coding gene and a set of**  
438 **transposable elements**. *PloS one* 2008, **3**(6):e2521.
- 439 28. Kelley D, Rinn J: **Transposable elements reveal a stem cell-specific class of long**  
440 **noncoding RNAs**. *Genome biology* 2012, **13**(11):R107.
- 441 29. Necsulea A, Soumillon M, Warnefors M, Liechti A, Daish T, Zeller U, Baker JC,  
442 Grutzner F, Kaessmann H: **The evolution of lncRNA repertoires and expression**  
443 **patterns in tetrapods**. *Nature* 2014, **505**(7485):635-640.
- 444 30. Vilella AJ, Severin J, Ureta-Vidal A, Heng L, Durbin R, Birney E: **EnsemblCompara**  
445 **GeneTrees: Complete, duplication-aware phylogenetic trees in vertebrates**.  
446 *Genome research* 2009, **19**(2):327-335.
- 447 31. Rearick D, Prakash A, McSweeney A, Shepard SS, Fedorova L, Fedorov A: **Critical**  
448 **association of ncRNA with introns**. *Nucleic acids research* 2011, **39**(6):2357-2366.
- 449 32. Derrien T, Johnson R, Bussotti G, Tanzer A, Djebali S, Tilgner H, Guernec G, Martin D,  
450 Merkel A, Knowles DG *et al*: **The GENCODE v7 catalog of human long noncoding**  
451 **RNAs: analysis of their gene structure, evolution, and expression**. *Genome research*  
452 2012, **22**(9):1775-1789.
- 453 33. Rogozin IB, Carmel L, Csuros M, Koonin EV: **Origin and evolution of spliceosomal**  
454 **introns**. *Biology direct* 2012, **7**:11.
- 455 34. Zhang Y, Romanish MT, Mager DL: **Distributions of transposable elements reveal**  
456 **hazardous zones in mammalian introns**. *PLoS computational biology* 2011,  
457 **7**(5):e1002046.

35. Qureshi IA, Mehler MF: **Emerging roles of non-coding RNAs in brain evolution, development, plasticity and disease.** *Nature reviews Neuroscience* 2012, **13**(8):528-541.
36. Mustafi D, Kevany BM, Bai X, Maeda T, Sears JE, Khalil AM, Palczewski K: **Evolutionarily conserved long intergenic non-coding RNAs in the eye.** *Human molecular genetics* 2013, **22**(15):2992-3002.
37. Lukovic D, Moreno-Manzano V, Klabusay M, Stojkovic M, Bhattacharya SS, Erceg S: **Non-coding RNAs in pluripotency and neural differentiation of human pluripotent stem cells.** *Frontiers in genetics* 2014, **5**:132.
38. Hamosh A, Scott AF, Amberger JS, Bocchini CA, McKusick VA: **Online Mendelian Inheritance in Man (OMIM), a knowledgebase of human genes and genetic disorders.** *Nucleic acids research* 2005, **33**(Database issue):D514-517.

## Figures

**Fig. 1. A sketch map illustrates the putative protein-coding orthologs of human lincRNAs in other species.**

**Fig. 2. The ratios of genomic loci of putative orthologs of human lincRNAs in nine species.** Most lincRNAs have putative orthologs being annotated as intergenic regions (4,212 in chimpanzee, 3,971 in orangutan, 4,001 in macaque, 2,321 in cow, 2,328 in dog, 1,042 in mouse, 317 in opossum, 136 in chicken, and 20 in zebrafish). Nevertheless, for a notable number of lincRNAs, the corresponding putative orthologs are overlapping with protein-coding genes (the numbers of coding orthologs as defined in Methods are: 163 in chimpanzee, 314 in orangutan, 276 in macaque, 130 in cow, 235 in dog, 260 in mouse, 78 in opossum, 19 in chicken, and 15 in zebrafish). The corresponding putative orthologs overlapping with non-coding genes are less comparing to intergenic regions and protein-coding gene (16 in chimpanzee, 13 in orangutan, 15 in macaque, 8 in cow, 6 in dog, 5 in mouse, 4 in opossum, 4 in chicken, and 1 in zebrafish).

**Fig. 3. Ternary plot of intronic coverage, intergenic coverage, and exonic coverage.** 1124 (52%) protein-coding orthologs that are completely intronic. Alternatively, 263 (12%) are completely exonic. The size of each dot correlates with the number of lincRNAs having this

combination of *exonic coverages*, *intronic coverages*, and *intergenic coverages*. The blue shadow illustrates the estimated distribution.

**Fig. 4. The distributions of *TE coverages* in the putative orthologs of lincRNA.** (a)

intronic orthologs, (b) exonic orthologs, and (c) intergenic orthologs.

**Fig. 5. The syntenic regions across six species of lincRNA CTD-2555O16.1 which overlapped with unitary pseudogenes TEX21P.** The human pseudogene TEX21P possesses homologous protein Tex21 in orangutan, mouse, cow, dog, and opossum. Protein-coding genes are indicated in black, RNA-genes in gray, and pseudogenes in white.

**Fig. 6. An example of lincRNAs overlapped with known pseudogenes.** LincRNA RP5-998N21.4 overlapped with the transcripts of pseudogenes FCGR1C (figure modified from Ensembl genome browser Ver.74). As this particular lincRNA overlaps in antisense with the transcribed pseudogene, the regulatory sequences involved in the lincRNA expression could be different than the ones of the processed pseudogene.

## Additional files

**Additional file 1 - Table S1.** The putative orthologs of human lincRNAs in the nine analyzed species.

**Additional file 2 - Fig. S1.** The workflow for identifying the putative orthologs of lincRNAs in the nine species.

**Additional file 3 - Fig. S2.** The Blastn *e*-value distributions of shuffled sequences and 193 lincRNAs (see Methods).

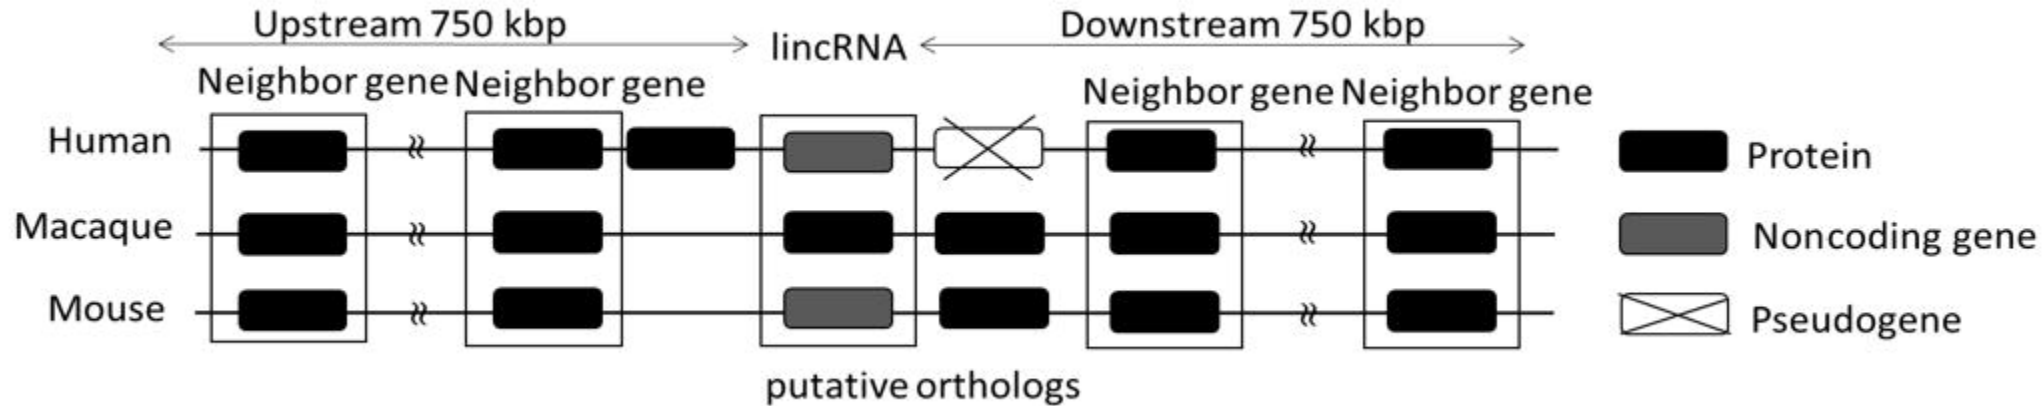

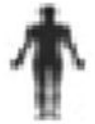

Human

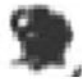

Chimpanzee

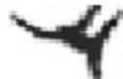

Orangutan

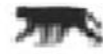

Macaque

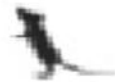

Mouse

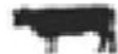

Cow

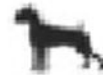

Dog

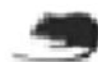

Opossum

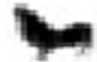

Chicken

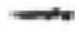

Zebrafish

■ Intergenic

■ Coding

■ NonCoding

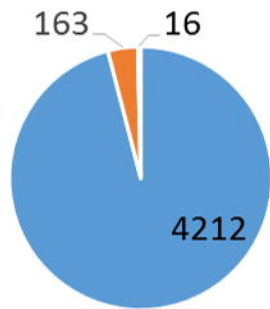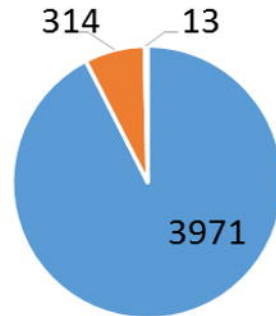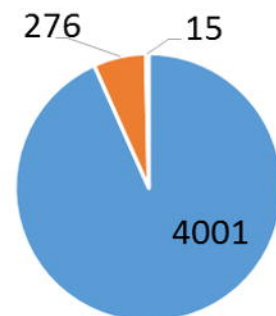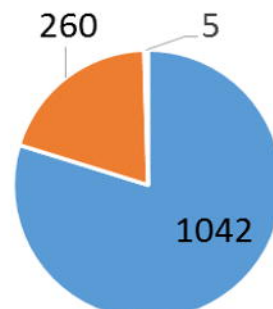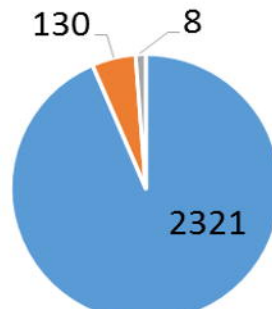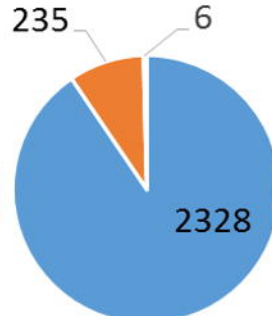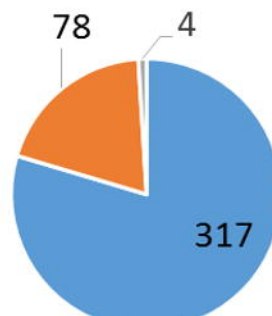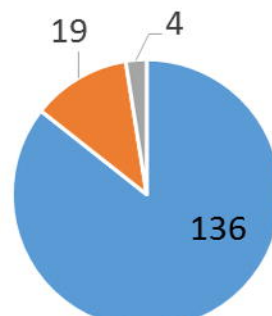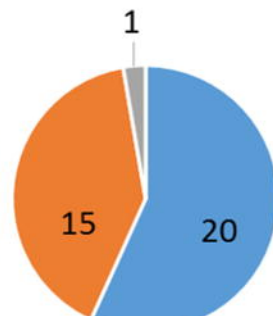

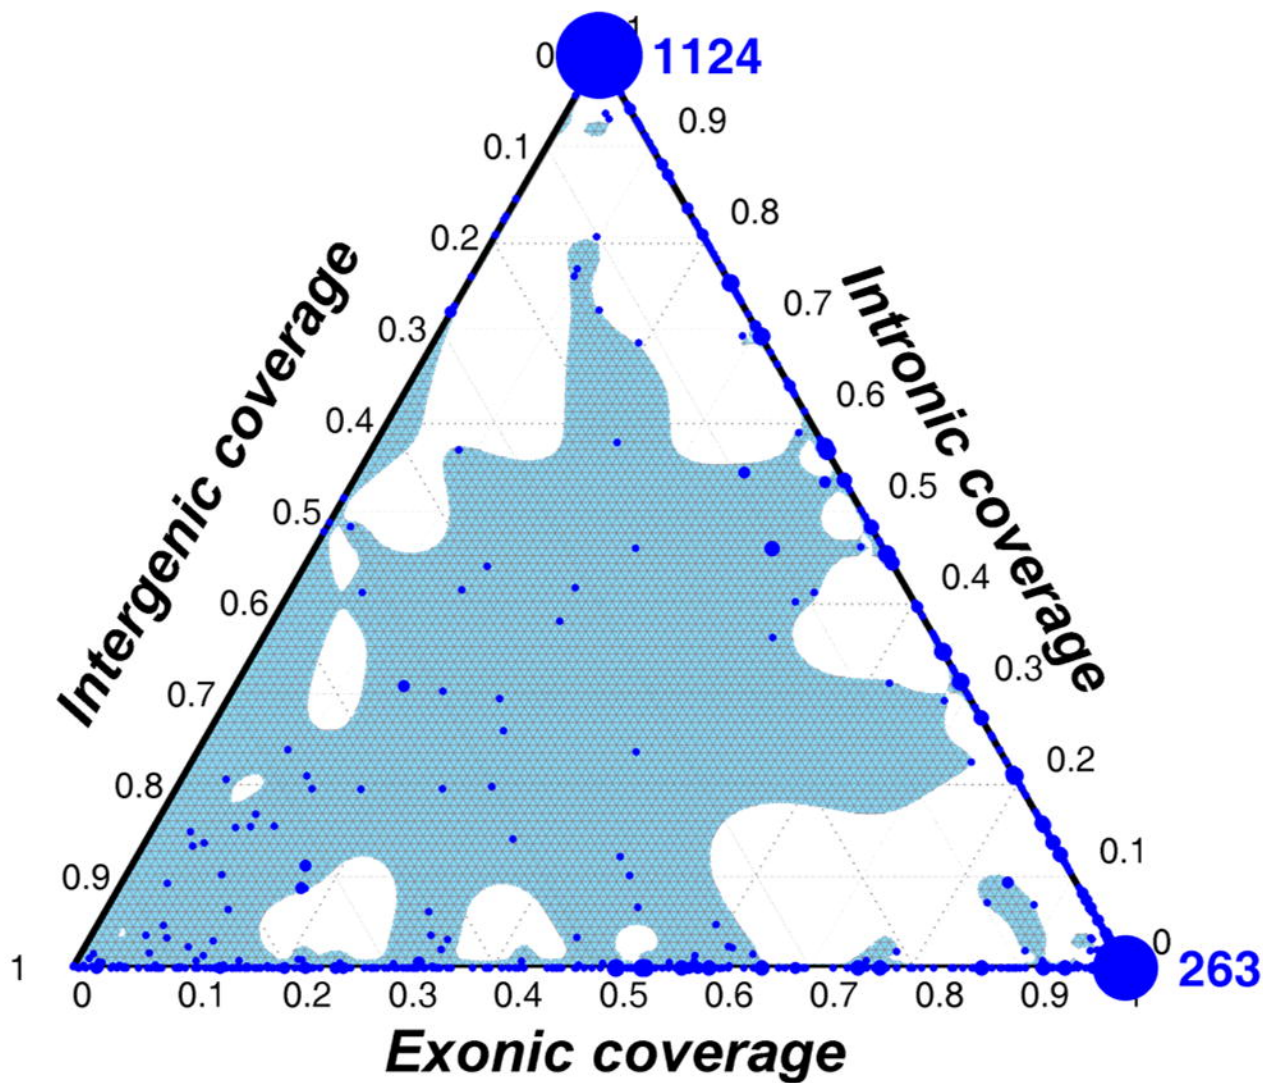

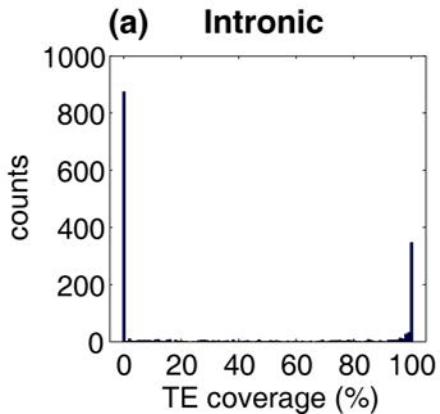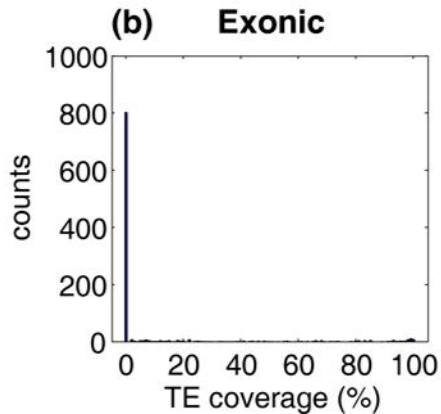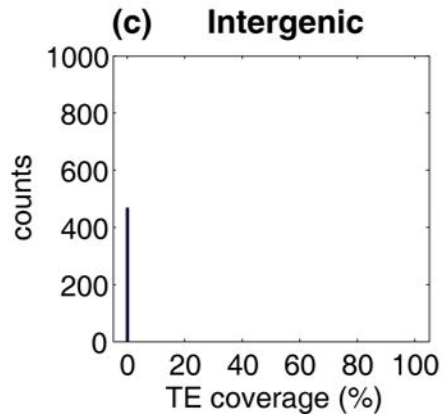

SYNE2

ESR2

TEX21P

MTHFD1

AKAP5

Human

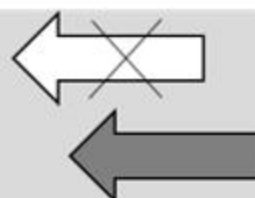

CTD-2555O16.1

Orangutan

Mouse

Cow

Dog

Opposum

SYNE2

ESR2

TEX21

MTHFD1

AKAP5

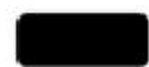

Protein

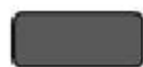

Noncoding

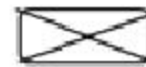

Pseudogene



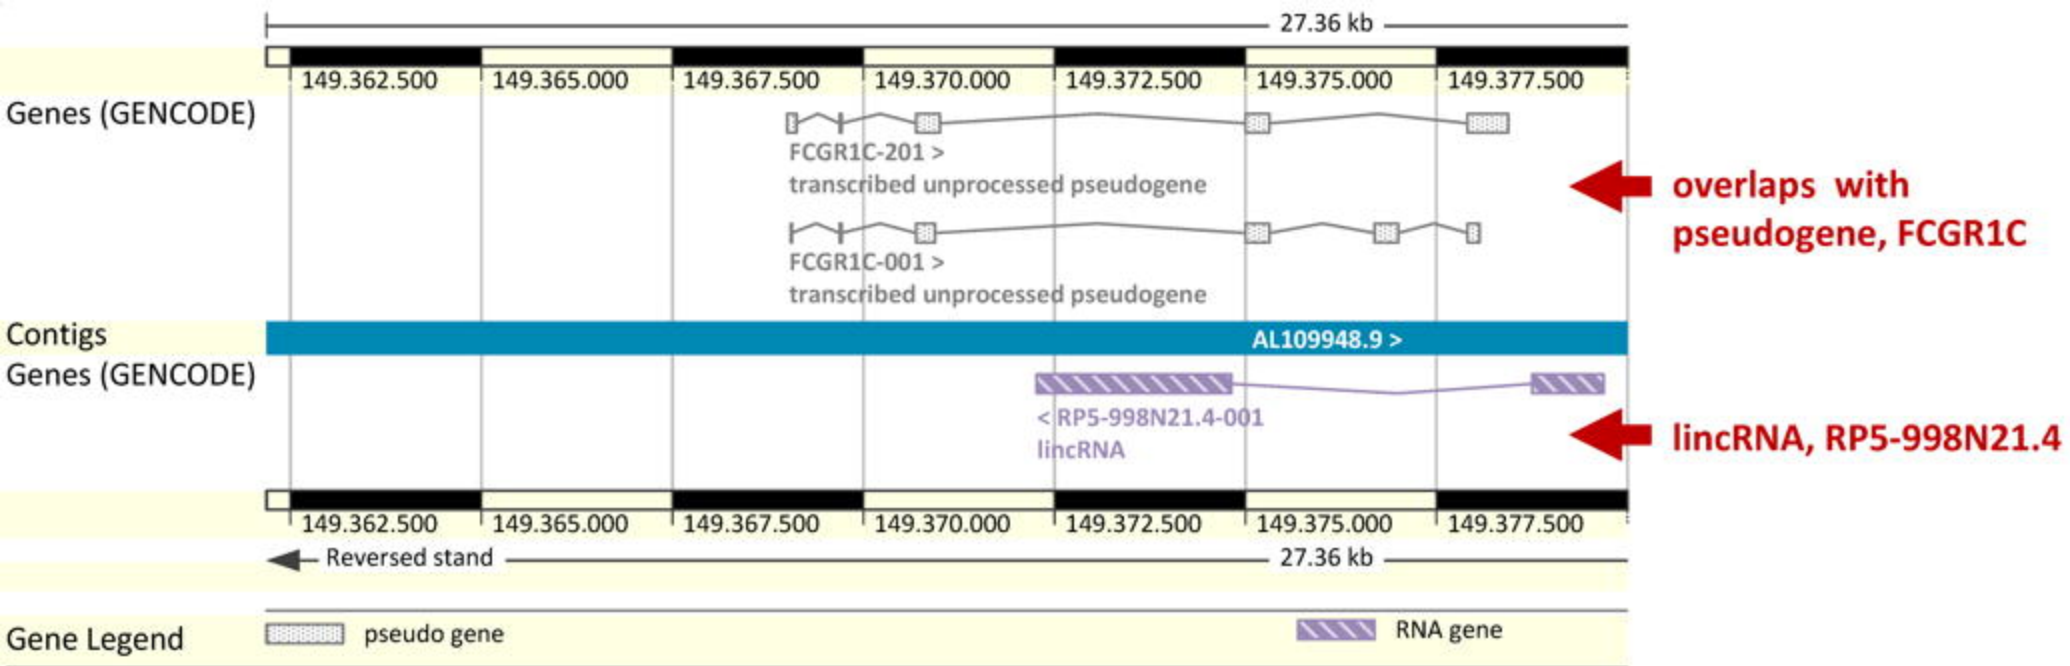

Source: http://www.biorxiv.org/content/10.1101/163626v1.full.pdf
